# Supplementary material for: Self-care in children and young people with complex chronic conditions: a qualitative study using Emotional Text Mining
Source: Frontiers journal article supplement (doi:10.3389/fped.2023.1170268), 2023-07-28

### Supplementary Table 4

## Self-care in children and young people with complex chronic conditions: A qualitative study using Emotional Text Mining

Giuseppina Spitaletta<sup>§</sup>, Valentina Biagioli<sup>§</sup>, Francesca Greco, Rachele Mascolo, Annachiara Liburdi, Giulia Manzi, Orsola Gawronski, Riccardo Ricci, Emanuela Tiozzo, Ercole Vellone, Teresa Grimaldi Capitello, Michele Salata, Massimiliano Raponi, Immacolata Dall'Oglio\* and Self-care CYP Study Group

<sup>§</sup>These authors share first authorship

\* **Correspondence:** Immacolata Dall'Oglio: [immacolata.dalloglio@opbg.net](mailto:immacolata.dalloglio@opbg.net)

**Supplementary Table 4.** Characteristics of healthcare professionals (n = 33)

|                                   | N (%)         |
|-----------------------------------|---------------|
| <b>Sex</b>                        |               |
| Male                              | 1 (3.03)      |
| Female                            | 32 (96.97)    |
| <b>Age (mean, SD)</b>             | 47.24 (11.01) |
| <b>Nationality: Italian</b>       | 33 (100)      |
| <b>Children</b>                   |               |
| Yes                               | 20 (60.60)    |
| No                                | 13 (39.39)    |
| <b>Professional qualification</b> |               |
| Nurse                             | 1 (3.03)      |
| Pediatric Nurse                   | 12 (36.36)    |
| Physician                         | 11 (33.33)    |

---

|                            |            |
|----------------------------|------------|
| Rehabilitation Therapist   | 4 (12.12)  |
| Psychologist               | 2 (6.06)   |
| Dieticians                 | 3 (9.09)   |
| <b>Level of education</b>  |            |
| High School                | 3 (9.09)   |
| Bachelor's Degree          | 12 (36.36) |
| Master's Degree            | 6 (18.18)  |
| Medical Specialty          | 11 (33.33) |
| Regional Advance Course    | 1 (3.03)   |
| <b>Years of experience</b> |            |
| $1 \leq x \leq 10$         | 8 (24.24)  |
| $11 \leq x \leq 20$        | 8 (24.24)  |
| $>20$                      | 17 (51.52) |

---

SD= Standard Deviation

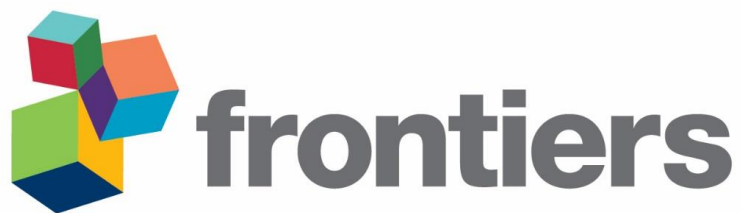

Supplement: Data_Sheet_4.PDF [file Data_Sheet_4.PDF]
